# Supplementary material for: A Study to Assess the Knowledge on Emotional Intelligence and Its Relation With Job Succession Among Staff Nurses in Selected Hospital, Odisha, India
Source: Research Square preprint supplement (doi:10.21203/rs.3.rs-7073946/v1), 2025-07-23
Supplement: Supplementary file 1 [file c31f753aeec1c538a41d828d.docx]

**Knowledge on Emotional Intelligence Questionnaire**

It is a structured questionnaire, contains 18 items with four options. One single answer carries 1 marks and one wrong answer carries 0 marks. The maximum possible scores for the emotional intelligence is 18 points and it is interpreted as : Low level of emotional intelligence (0-6points), Average level of emotional intelligence (7-12 points), High level of emotional intelligence (13-18 points).

All the information (response) given by you will be kept confidential & used only for study purpose. Choose the correct one. Kindly answer all the questions.

1. **Emotional Intelligence is about which one of the following?**
   1. Participating in understanding & regulating conversations under stress.
   2. Applying the behaviours that come from having a high IQ to situation.
   3. Perceiving, understanding & regulating emotions under stress.
   4. Perceiving, understanding & regulating emotions effectively
2. **Emotional Intelligence refers to qualities such as understanding one’s own feeling, empathy for others and-**
   1. Possessing above average verbal skills.
   2. The ability to manage emotions.
   3. Having a good sense of human.
   4. Understanding human relations research.
3. **How do emotions spread from one person to another?**
   1. Because of group think.
   2. Emotion do not spread from one person to another.
   3. Through our natural tendency to mimic physical behaviors of the people we interact with.
   4. Through negative sentiment.
4. **Which is not a key component of Emotional Intelligence?**
   1. Self- awareness.
   2. Self- management.
   3. Commitment.
   4. Empathy.
5. **Which of the following is the best advice for expressing your emotions**?
   1. Express your feelings as soon as they occur to you.
   2. Recognize that feelings & acting out the feeling are the same.
   3. Accept responsibility for your own feelings.
   4. Tell yourself you should not feel bad5
6. **Emotional intelligence is different from other intelligences in that**
   1. It is a set of skills.
   2. It can be measured using tests easily.
   3. The focus is on emotional reasoning, ability, & knowledge.
   4. It is a new type of intelligence
7. **Emotional intelligence is our ability to**
   1. Accurately identify emotions in ourselves & others.
   2. Understanding & manage emotions.
   3. Use & effectively communicate emotional felling.
   4. All of the above.
8. **Which is not associate with emotional intelligence?**
   1. Self - awareness.
   2. Financial acumen
   3. Good people skills
   4. Able to manage emotion
9. **Emotional intelligence is different from other intelligences in that**
10. It is a set of skills.
11. It can be measured using tests easily.
12. The focus is on emotional reasoning, ability, & knowledge.
13. It is a new type of intelligence
14. **Emotional intelligence is characterized by**
    1. Proficient in problem solving.
    2. Better interpersonal relationship.
    3. High abstract thinking ability.
    4. Good sense of humor.
15. **Emotional intelligence refers primarily to**
    1. The ability to suppress most emotions.
    2. The ability to vent emotion.
    3. The ability to hide most emotion.
    4. Ability to accurately perceive and interpret one’s own emotions and emotions of others.
16. **Emotional intelligence is our ability to**

A. To avoid unpleasant setting.

B. That affect social functioning.

C. That improves physical performance.

D. None of this.

1. **The term Emotional Intelligence refers to the ability & skill of interacting-**
   1. Well with others.
   2. A belief that women are too emotional to be intelligent.
   3. A tendency of highly intelligent people to be emotional unbalanced.
   4. None of this.

14**. Which of the following attributes best describes someone with good emotional intelligence?**

A. Manipulative

B. Perceptive

C. Productive

D. Conceited

1**5. How does emotional intelligence interfere with human skills?**

A. It makes for you to decide what to do in stressful situation.

B. It can help to communicate better & live more peacefully & be successful.

C. It can help you memorize, learn, & study better & get a degree.

D. All of the above.

**16. Which of these skill needed for emotional intelligence shows a willingness to put the time into doing a job well?**

A. Self-awareness

B. Motivation

C. Empathy

D. Social skills

1**7. A person with high emotional intelligence is likely to do which of the following?**

A. Use emotional information wisely.

B. Establish positive relationship with others.

C. Further harmony & co-operation.

D. All of above.

**18. Which of the following statement is true about emotional intelligence**

A. Emotional intelligence is not co-related with job succession.

B. Emotional intelligence depends on a person’s awareness of his\her own Emotions & the ability to deal with effectively.

C. There is no research- based evidence for emotional intelligence yet.

D. Emotional intelligence can’t be learned, it is genetics.
