# Supplementary material for: A Study to Assess the Knowledge on Emotional Intelligence and Its Relation With Job Succession Among Staff Nurses in Selected Hospital, Odisha, India
Source: Research Square preprint supplement (doi:10.21203/rs.3.rs-7073946/v1), 2025-07-23
Supplement: Supplementary file 2 [file fdf92bce3faae1fd34f1794e.docx]

##### Job succession questionnaire

There are10 items in this scale indicate about your feelings and thoughts. Please read each item carefully put a ‘tick’ mark in the columns for your appropriate response. There are five response for each of the item given below they are: (5) strongly agree, (4) Agree, (3) Neutral

, (2) Disagree, (1) strongly disagree. All the information (response) given by you will be kept confidential and used only for the study purpose. Kindly answer all the questions

| **No** | **ITEMS** | **Strongly Agree (5)** | **Agree (4)** | **Neutral**  **(3)** | **Disagree**  **(2)** | **Strongly Disagree(1)** |
| --- | --- | --- | --- | --- | --- | --- |
| 1 | Does the job are used your  Skills and abilities effectively? |  |  |  |  |  |
| 2 | Are there enough opportunities for you to learn new skills and  develop professionally |  |  |  |  |  |
| 3 | Do you feel respected by  management efforts and ideas |  |  |  |  |  |
| 4 | Is stress in your workplace affecting your life outside of work |  |  |  |  |  |
| 5 | You feel encouraged to come up  with new and better ways of doing things |  |  |  |  |  |
| 6 | The hospital does an excellent job of keeping employees informed  About matters affecting |  |  |  |  |  |
| 7 | When a patient is dissatisfied, you  can usually correct the problem to their satisfaction |  |  |  |  |  |
| 8 | How Satisfied are you with your involvement in decision that effect  your work |  |  |  |  |  |
| 9 | You feel your performance is fairly evaluated |  |  |  |  |  |
| 10 | Your co-worker and you work well together |  |  |  |  |  |
